# Supplementary material
Source: PubMed Central journal article supplement (PMC6142981)
Supplement: jamainternmed-178-1210-s001.pdf [file jamainternmed-178-1210-s001.pdf]

## Supplementary Online Content

Clarke MA, Long BJ, Del Mar Morillo A, Arbyn M, Bakkum-Gamez JN, Wentzensen N. Association of endometrial cancer risk with postmenopausal bleeding in women: a systematic review and meta-analysis. *JAMA Intern Med.* Published online August 6, 2018. doi:10.1001/jamainternmed.2018.2820

**eFigure 1.** PRISMA Flow Diagram

**eFigure 2.** Prevalence of PMB in Women With Stage I vs Stages II-IV Endometrial Cancers

**eFigure 3.** Prevalence of PMB in Women With Endometrial Cancer, Stratified by Geographic Region

**eFigure 4.** Prevalence of PMB in Women With Endometrial Cancer by Study Enrollment Period

**eFigure 5.** Risk of Endometrial Cancer in Women With PMB by Geographic Region

**eFigure 6.** Risk of Endometrial Cancer in Women With PMB, Stratified by Study Enrollment Period

**eFigure 7.** Risk of Endometrial Cancer in Women With PMB by Potential for Study Verification Bias

**eMethods.** Study Retrieval and Evaluation and Data Analysis

**eTable 1.** Results of Quality Assessment of the 92 Studies Included in the Analysis of Risk of Endometrial Cancer in Women With PMB

**eTable 2.** Results of Sensitivity Analyses Based on Quality Assessment

This supplementary material has been provided by the authors to give readers additional information about their work.

eFigure 1. PRISMA Flow

Diagram

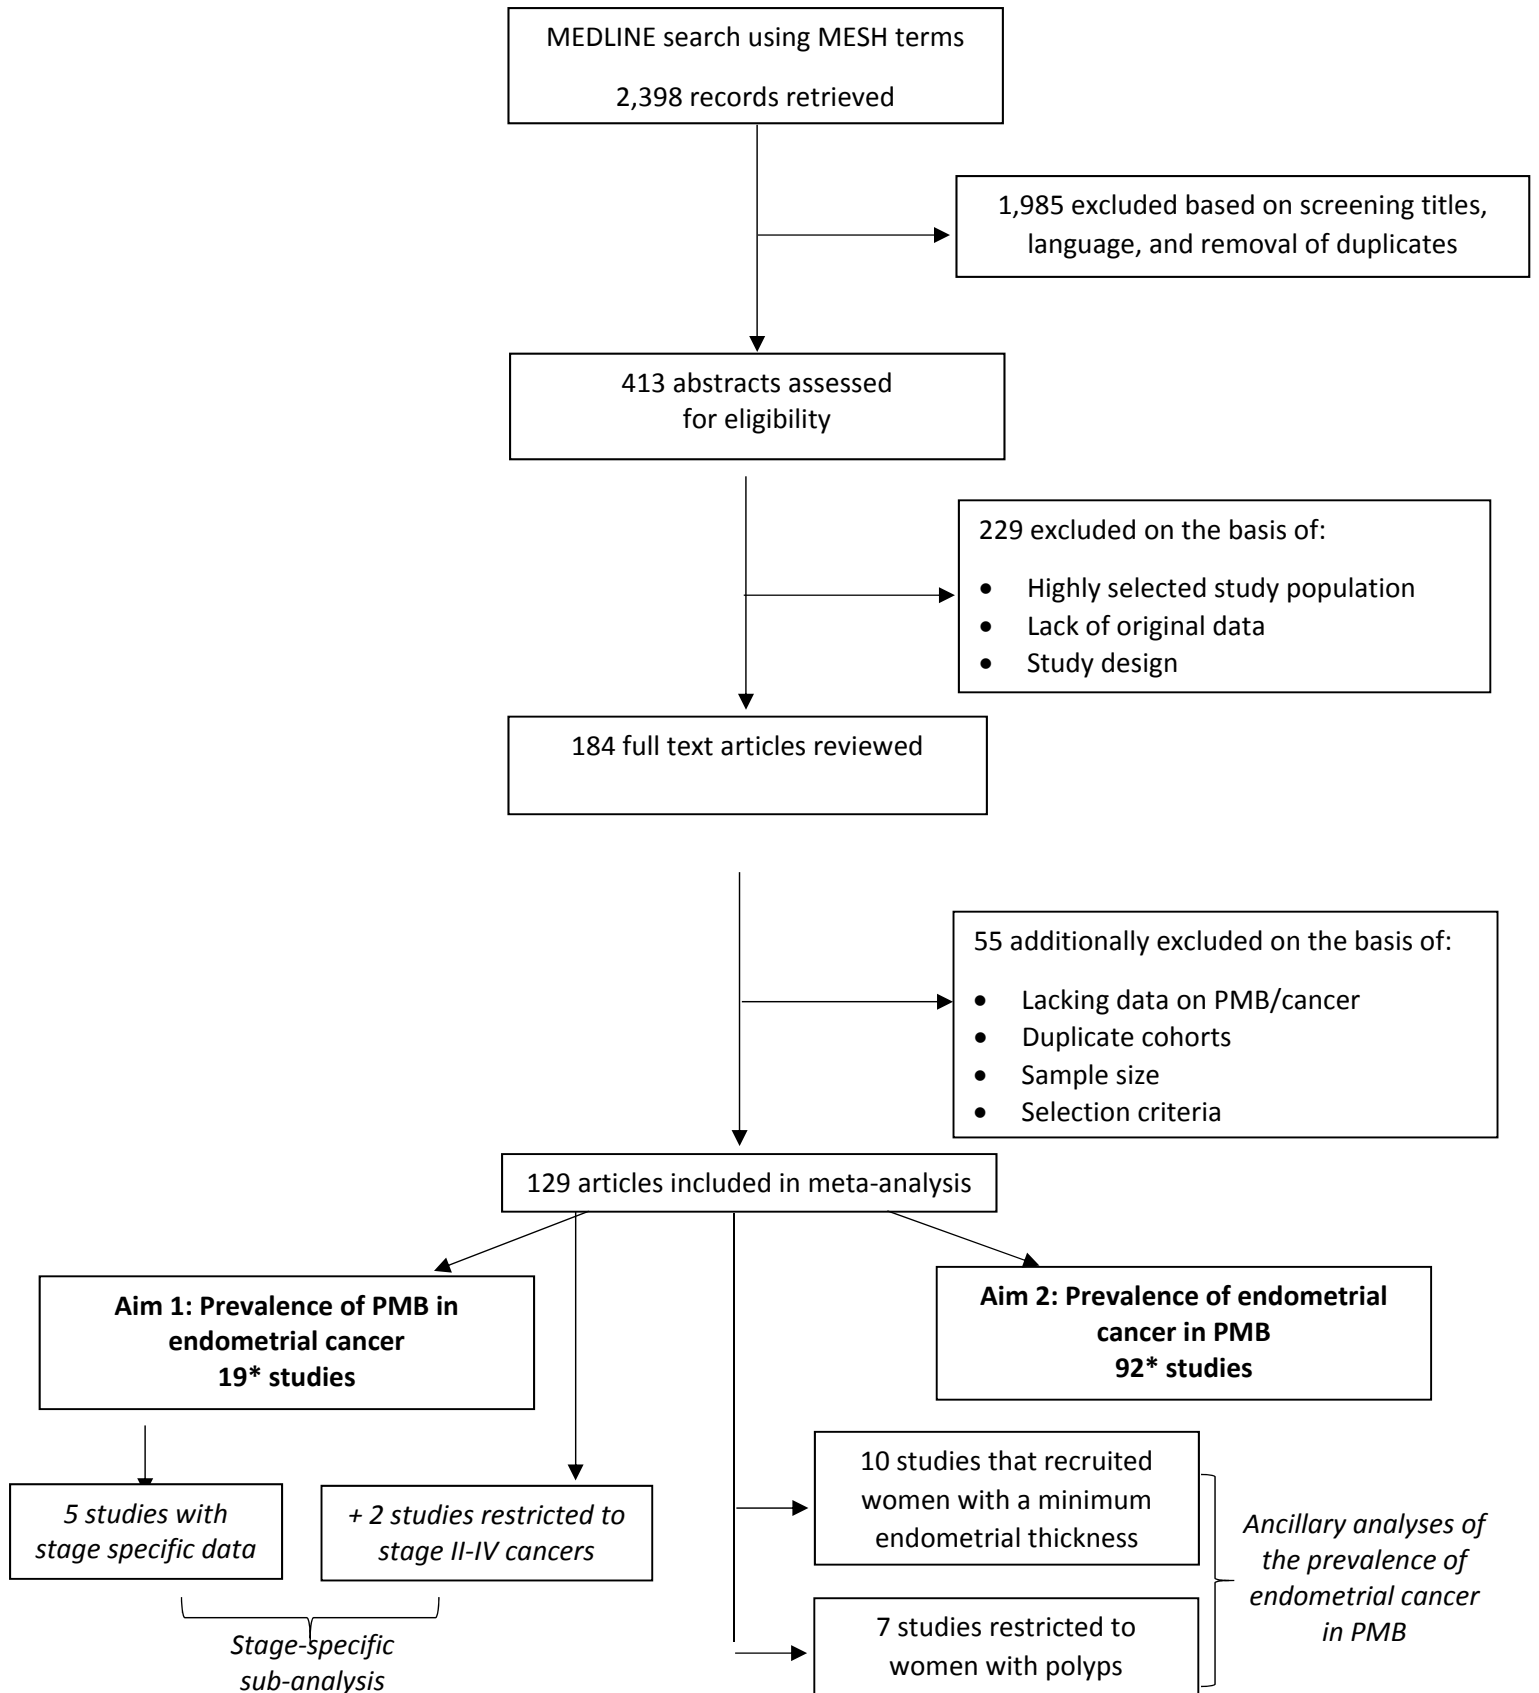

eFigure 2. Prevalence of PMB in Women With Stage I vs Stages II-IV Endometrial Cancers  
 \*One study included in both aims.

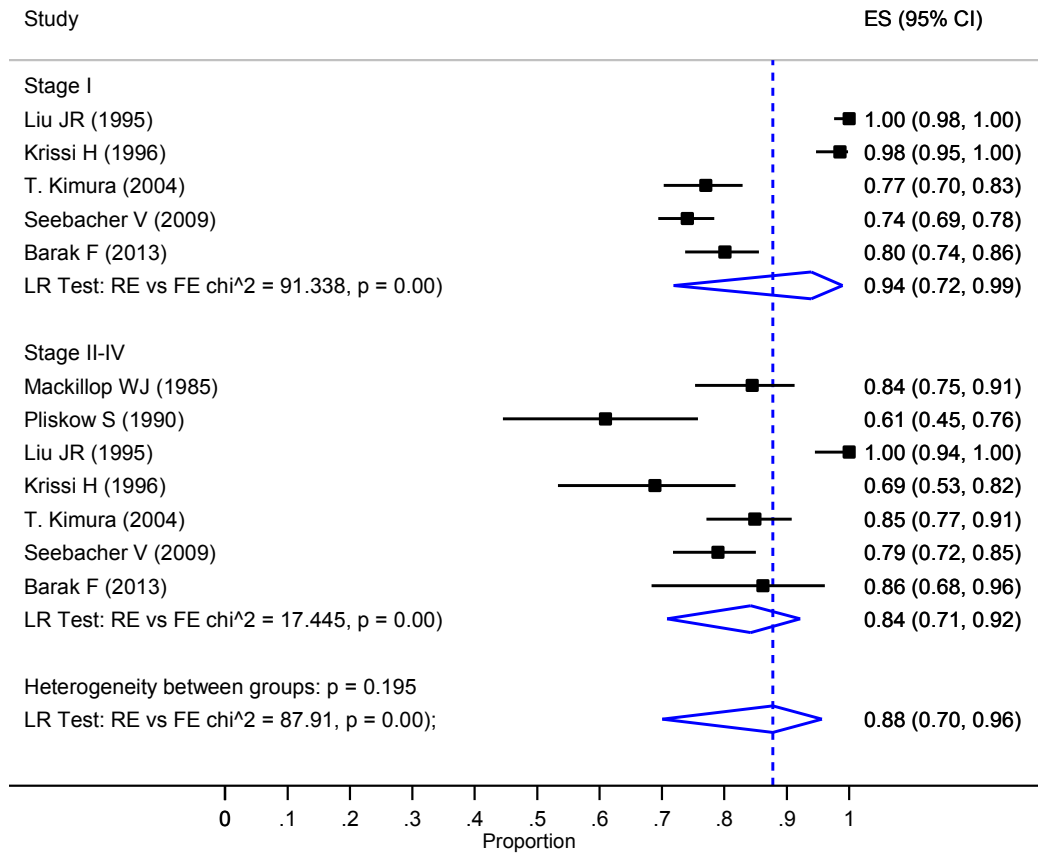

eFigure 3. Prevalence of PMB in Women With Endometrial Cancer, Stratified by Geographic Region

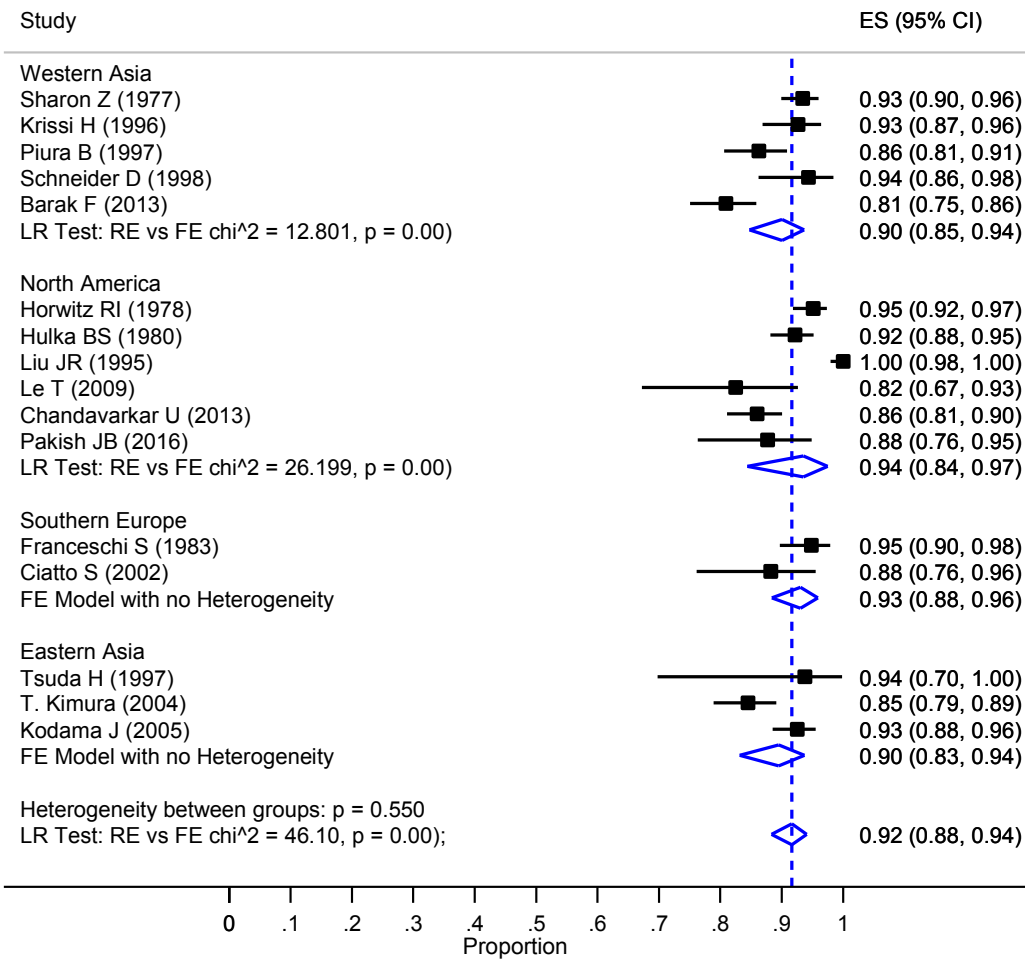

eFigure 4. Prevalence of PMB in Women With Endometrial Cancer by Study Enrollment Period

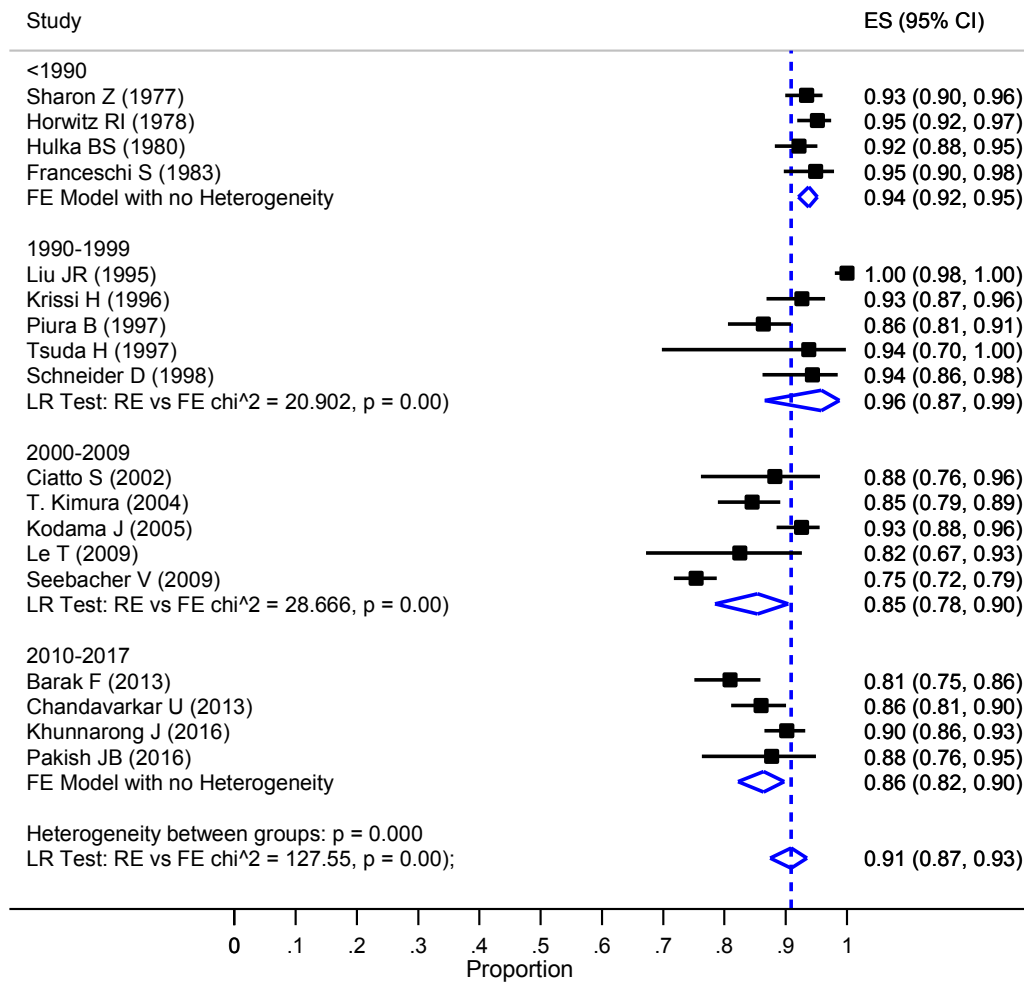

eFigure 5. Risk of Endometrial Cancer in Women With PMB by Geographic Region

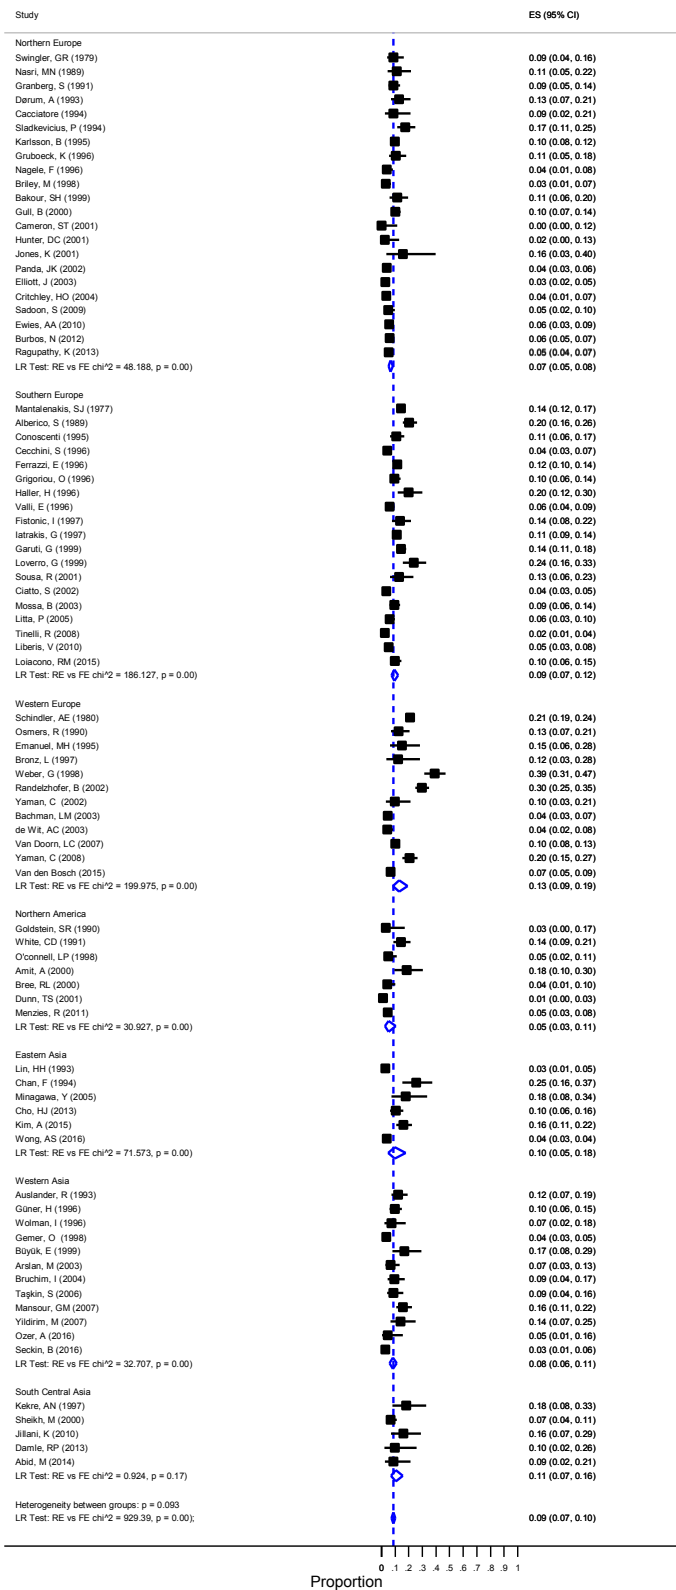

eFigure 6. Risk of Endometrial Cancer in Women With PMB, Stratified by Study Enrollment Period

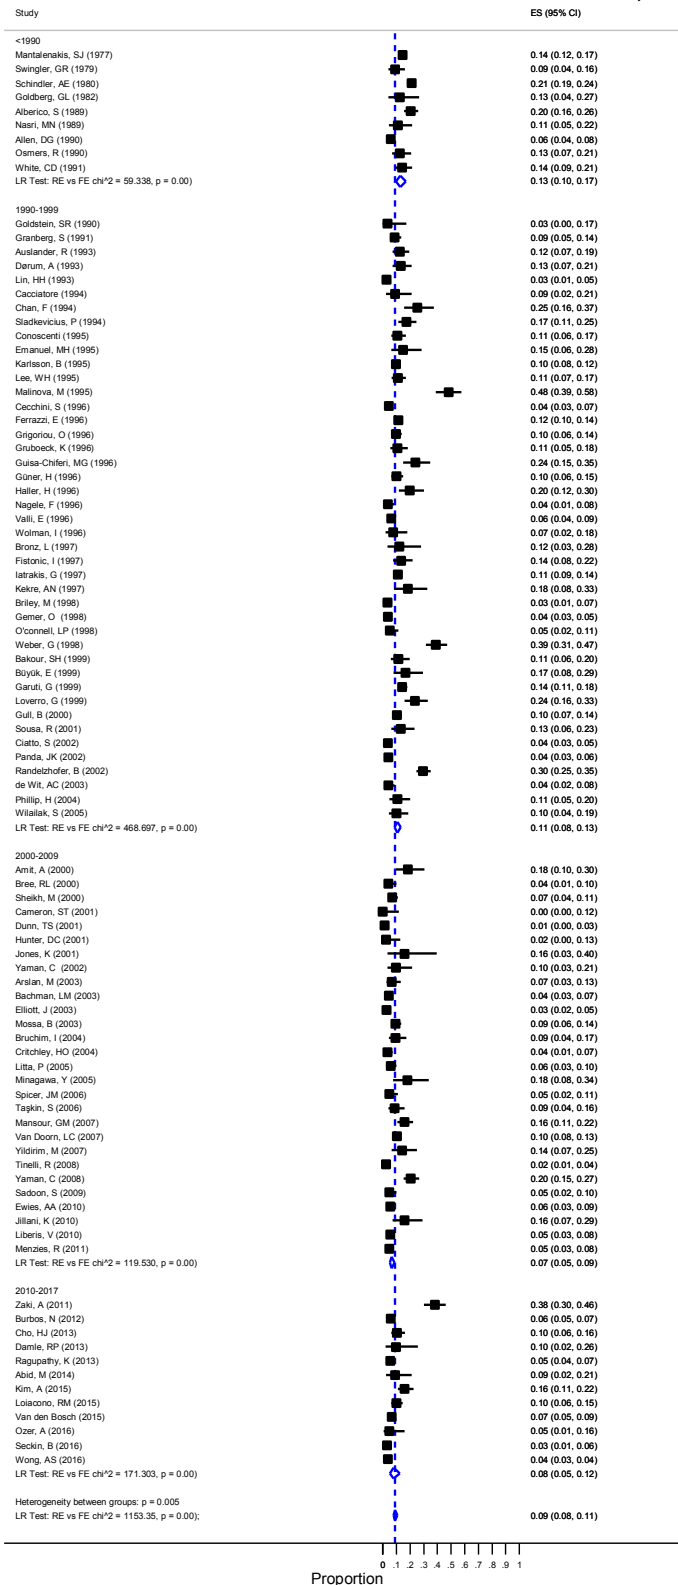

eFigure 7. Risk of Endometrial Cancer in Women With PMB by Potential for Study Verification Bias

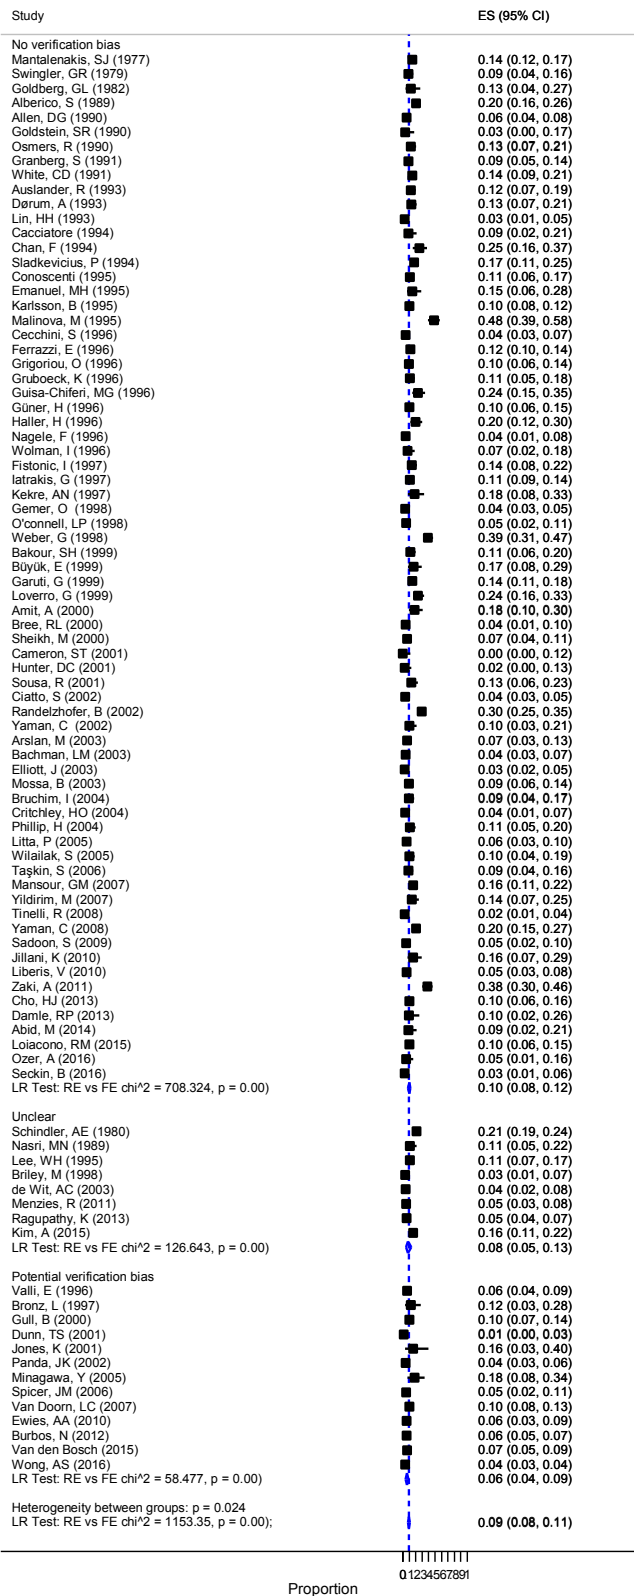



## eMethods. Study Retrieval and Evaluation and Data Analysis

### Aims:

1. Evaluate the prevalence of postmenopausal bleeding in endometrial cancer (i.e., the sensitivity of postmenopausal bleeding for endometrial cancer detection)
2. Evaluate the risk of endometrial cancer in women with postmenopausal bleeding (i.e., the positive predictive value of postmenopausal bleeding for detection of endometrial cancer)
  - a. Secondary analyses:
    - i. Evaluate the risk of endometrial cancer in women with postmenopausal bleeding in studies that excluded women below a minimum endometrial thickness (n=10)
    - ii. Evaluate the risk of endometrial cancer in women with postmenopausal bleeding in studies restricted to women with endometrial polyps (n=7)

### Methods:

1. Criteria for Considering Studies
  - a. Types
    - i. Aim 1:
      1. Cross-sectional, case-series studies evaluating the prevalence of postmenopausal bleeding in women with endometrial cancer
      2. Retrospective chart review of endometrial cancer cases
      3. Case-control studies evaluating the prevalence of postmenopausal bleeding
    - ii. Aim 2:
      1. Cross-sectional studies evaluating the prevalence of endometrial cancer in women with postmenopausal bleeding
      2. Retrospective or prospective cohort studies evaluating the risk of endometrial cancer in women with postmenopausal bleeding
  - b. Participants
    - i. Aim 1: Postmenopausal women with endometrial cancer
    - ii. Aim 2: Postmenopausal women with abnormal uterine bleeding
  - c. Outcomes
    - i. Aim 1: Postmenopausal bleeding based on the medical record, patient or clinician report
    - ii. Aim 2: Histologically confirmed diagnosis of endometrial cancer
2. Electronic Searches
  - a. Databases: PubMed and Embase
  - b. Search strategy:
    - i. Endometrial Cancer
      1. Index terms: Endometrial Neoplasms[Mesh] 'endometrium cancer'/exp Emtree 'endometrium cancer'/exp/dm\_et

2. Synonyms: Endometrial Neoplasm, Endometrial Carcinoma(s), Endometrial Cancer(s), Endometrium Cancer, Cancer of the Endometrium, Carcinoma of Endometrium, Endometrium Carcinoma(s), Endometrial Adenocarcinoma
  3. Endometrial Cancer search query: Endometrial Neoplasms[Mesh] OR "Endometrial Neoplasm"[tiab] OR "Endometrial Carcinoma"[tiab] OR "Endometrial Carcinomas"[tiab] OR "Endometrial Cancer"[tiab] OR "Endometrial Cancers"[tiab] OR "Endometrium Cancer"[tiab] OR "Cancer of the Endometrium"[tiab] OR "Carcinoma of Endometrium"[tiab] OR "Endometrium Carcinoma"[tiab] OR "Endometrium Carcinomas"[tiab] OR "Endometrial Adenocarcinoma"[tiab] OR "Endometrial Carcinoma"[tiab] OR "Endometrial Carcinomas"[tiab]
- ii. Vaginal bleeding
1. Index terms: "Uterine Hemorrhage"[Mesh] vagina bleeding'/exp [Emtree] 'vagina bleeding'/exp/dm\_et [Emtree]
  2. Synonyms: Uterine Hemorrhage(s), Uterine Bleeding(s), Vaginal Bleeding(s), Vagina Bleeding(s), Postmenopausal bleeding, Metrorrhagia
  3. Vaginal Bleeding PubMed search query:"Uterine Hemorrhage"[Mesh] OR ((abnormal[tiab] OR Uterine[tiab] OR Vaginal[tiab] OR vagina[tiab] OR Metrorrhagia[tiab] OR Postmenopausal[tiab])) AND (Bleeding\*[tiab] OR Hemorrhage\*[tiab]))
- iii. Exclusion terms: Polyp[tiab] OR polyps[tiab] OR interferon[tiab] OR "Case report" OR "Case reports" OR "Case Reports"[Publication Type] OR "Case study"[tiab] OR mice[tiab] OR mouse[tiab] OR rodent\*[tiab]

The search results from the PubMed and Embase databases were downloaded into the EndNote citations management program and the duplicates were removed.

### 3. Data Collection and Statistical Analysis

#### 1. Selection of studies

- a. Titles and abstracts of identified articles were independently screened for inclusion by three independent authors (ADM, BL, and MC). Full-text versions of eligible articles were reviewed by BL and MC to determine eligibility; any questions regarding the inclusion of studies were resolved by discussion with the senior author (NW).

#### 2. Inclusion criteria

- a. Studies were included if they contained original data and reported cancer outcomes by postmenopausal bleeding status. Data on selection criteria, sample size, exposure and outcome ascertainment were evaluated to determine study quality and generalizability (Supplementary Results Table 1); studies that included highly-selected populations, lacked detailed inclusion criteria, and/or included  $\leq 25$  women

were excluded. In the case of sequential or multiple publications where there was a possibility of overlapping data, only data from the most recent publication were included.

3. Data extraction and management
  - a. Predefined data extraction sheets (Excel)
  - b. Information included:
    - i. Authors
    - ii. Publication date
    - iii. Study design
    - iv. Enrollment years
    - v. Country
    - vi. Clinical setting
    - vii. Inclusion/exclusion criteria
    - viii. Method of outcome and exposure ascertainment
    - ix. Aggregate study-level participant characteristics (e.g., age, body mass index, years since menopause, parity, frequency of bleeding, hormone therapy use, tamoxifen use, other comorbidities)
    - x. Endometrial biopsy/surgical results (stage and histology, if available)
4. Assessment of study quality
  - a. For the 92 studies included in Aim 2, study quality was assessed using items from the Newcastle-Ottawa Quality Assessment Form for Case-Control Studies and the Quality Assessment of Diagnostic Accuracy Studies (QUADAS) tool. The most relevant items from each were chosen and adapted to assess the quality of included studies:
    1. Was the spectrum of patients representative of the patients who will receive the test in practice? (QUADAS)
    2. Were selection criteria clearly described? (QUADAS)
    3. Ascertainment of exposure (Newcastle-Ottawa)
      - a) secure record (e.g. surgical records)
      - b) structured interview where blind to case/control status
      - c) interview not blinded to case/control status
      - d) written self-report or medical record only
      - e) no description

*\*Note: unless specified, we assumed bleeding status was ascertained through patient report, which was categorized as b) structured interview where blind to case/control status*
    4. Is the diagnostic test likely to correctly classify the target condition? (QUADAS, adapted)
    5. Type of diagnostic test (Added)
    6. Was there an additional clinical test conducted before the diagnostic test (Added)
    7. Did patients receive the same diagnostic test regardless of the additional test result? (QUADAS, adapted)

8. Was the diagnostic test independent of the additional test? (QUADAS, adapted)
  9. Were the same clinical data available when test results were interpreted as would be available when the test is used in practice? (QUADAS)
  - b. Because we adapted these scales to be compatible with the studies included in our meta-analysis, we did not use an official scoring system; however, we ranked individual items according to the following color-coding scale:
    - i. Green = high quality
    - ii. Orange = fair quality
    - iii. Red = poor quality
  - c. The potential for verification bias was determined by items 7 and 8. If receipt or interpretation of the diagnostic test was dependent on the results of a prior clinical test (e.g., vaginal ultrasound) then studies were classified as having potential verification bias.
5. Statistical analysis
- a. Aims 1 and 2: Pooled prevalence estimates and 95% confidence intervals were estimated using logistic-normal random-effects models (*metaprop\_one* in Stata version 13).
  - b. For Aim 1, we focused on studies that did not restrict by cancer stage. However, in a sub-analysis, we analyzed the prevalence of PMB, stratified by stage (I and II-IV cancers) (Figure 1).
  - c. Subgroup meta-analyses to evaluate potential sources of heterogeneity:
    - i. Study exclusion criteria for hormone therapy use (Aim 2). Because hormone therapy is known to cause bleeding in postmenopausal women we wanted to evaluate the influence of hormone therapy use on the risk of endometrial cancer in women with PMB using study-level summary data.
    - ii. Geographical regions, defined by the World Health Organization for those in which more than one country was represented(22). We evaluated the influence of geographic regions because the risk of endometrial cancer and the clinical management of postmenopausal bleeding varies in different settings.
    - iii. Study enrollment period - If study enrollment dates were unavailable, publication date was used as a proxy. Years were grouped as <1990, 1990-1999, 2000-2009, and 2010-2017. Given the temporal trends in endometrial cancer incidence and changes in clinical management over time, we wanted to evaluate the influence of time period, approximated by using study enrollment dates.
  - d. Multilevel logistic random-effects models to evaluate the influence of continuous study-level (average) characteristics:
    - i. Age
    - ii. Number of years since menopause
    - iii. Percent of women using hormone therapy
  - e. Sensitivity analyses:

- i. Study design - classified as cross-sectional (case-series), or retrospective or prospective if follow-up time was specified.
  - ii. Study setting - classified as tertiary center versus other (e.g., hospital or clinic), determined from the methods or from the author affiliation if not well-described.
  - iii. Publication bias using Egger regression analyses
  - iv. Study Quality – using results from the quality assessment analysis (Aim 2), we evaluated the influence of the following items on our results:
    - 1. Selection criteria description (Item 1)
    - 2. Exposure ascertainment (Item 2)
    - 3. Clinical test conducted prior to diagnostic test (Item 6)
    - 4. Potential for verification bias (Items 7 and 8)
- f. Ancillary analyses:
- i. We simulated the performance of two approaches for early detection of endometrial cancer: transvaginal ultrasound (endometrial thickness cut-off of  $\leq 3$ mm), and candidate methylation markers in a hypothetical population of 10,000 women with PMB. Over a range of values based on risk estimates derived from our meta-analysis, we calculated the total number of women who would be sent to biopsy, the ratio of the number of biopsies per case of endometrial cancer detected, the positive predictive value, and the complement of the negative predictive value (i.e., the risk of endometrial cancer among women who test negative) for each test.

Table 1. Results of Quality Assessment of the 92 Studies Included in the Analysis of Risk of Endometrial Cancer in Women With PMB

| Author, Year   | 1. Was the spectrum of patients representative of the patients who will receive the test in practice? | 2. Were selection criteria clearly described? | 3. Ascertainment of exposure               | 4. Is the diagnostic test likely to correctly classify the target condition? | 5. Type of diagnostic test                          | 6. Was there an additional clinical test conducted before the diagnostic test? | 7. Did patients receive the same diagnostic test regardless of the additional test result? | 8. Was the diagnostic test independent of the additional test? | 9. Were the same clinical data available when test results were interpreted as would be available when the test is used in practice? |
|----------------|-------------------------------------------------------------------------------------------------------|-----------------------------------------------|--------------------------------------------|------------------------------------------------------------------------------|-----------------------------------------------------|--------------------------------------------------------------------------------|--------------------------------------------------------------------------------------------|----------------------------------------------------------------|--------------------------------------------------------------------------------------------------------------------------------------|
| Abid,2014      | Yes                                                                                                   | Yes                                           | Structured interview, blind to case status | Yes                                                                          | D&C                                                 | No                                                                             | N/A                                                                                        | N/A                                                            | Yes                                                                                                                                  |
| Alberico,1989  | Yes                                                                                                   | Somewhat                                      | Secure record                              | Yes                                                                          | D&C                                                 | No                                                                             | N/A                                                                                        | N/A                                                            | Yes                                                                                                                                  |
| Allen,1990     | Yes                                                                                                   | Somewhat                                      | Secure record                              | Yes                                                                          | D&C, with hysteroscopy or laparoscopy, hysterectomy | No                                                                             | N/A                                                                                        | N/A                                                            | Yes                                                                                                                                  |
| Amit,2000      | Yes                                                                                                   | Yes                                           | Structured interview, blind to case status | Yes                                                                          | D&C                                                 | Blood flow measurement with Doppler, vaginal ultrasound                        | Yes                                                                                        | Yes                                                            | Yes                                                                                                                                  |
| Arslan,2003    | Yes                                                                                                   | Yes                                           | Secure record                              | Yes                                                                          | D&C and hysteroscopy                                | Vaginal doppler ultrasound                                                     | Yes                                                                                        | Yes                                                            | Yes                                                                                                                                  |
| Auslander,1993 | Yes                                                                                                   | Yes                                           | Structured interview, blind to case status | Yes                                                                          | Fractional D&C                                      | Vaginal ultrasound                                                             | Yes                                                                                        | Yes                                                            | Yes                                                                                                                                  |
| Bachman,2003   | Yes                                                                                                   | Yes                                           | Secure record                              | Yes                                                                          | Pipelle biopsy                                      | Pelvic ultrasound                                                              | Yes                                                                                        | Yes                                                            | Yes                                                                                                                                  |
| Bakour,1999    | Yes                                                                                                   | Somewhat                                      | Secure record                              | Yes                                                                          | Pipelle biopsy or curettage                         | Vaginal ultrasound                                                             | Yes                                                                                        | Yes                                                            | Yes                                                                                                                                  |
| Bree,2000      | Yes                                                                                                   | Yes                                           | Secure record                              | Yes                                                                          | D&C, hysteroscopy, hysterectomy                     | Hysterosonography and ultrasound                                               | Yes                                                                                        | Yes                                                            | Yes                                                                                                                                  |

|                 |     |          |                                            |                |                                                        |                                                        |         |         |     |
|-----------------|-----|----------|--------------------------------------------|----------------|--------------------------------------------------------|--------------------------------------------------------|---------|---------|-----|
| Briley,1998     | Yes | Yes      | Secure record                              | Yes            | Pipelle aspiration, hysteroscopy, D&C, or hysterectomy | Vaginal ultrasound                                     | Unclear | Unclear | Yes |
| Bronz,1997      | Yes | Somewhat | Secure record                              | Yes            | Hysteroscopy and D&C                                   | Bimanual exam                                          | No      | No      | Yes |
| Bruchim,2004    | Yes | Somewhat | Structured interview, blind to case status | Yes            | Hysteroscopy and pipelle biopsy                        | Vaginal ultrasound                                     | Yes     | Yes     | Yes |
| Burbos,2012     | Yes | Yes      | Structured interview, blind to case status | Pipelle biopsy | Pipelle biopsy                                         | Vaginal Ultrasound                                     | No      | No      | Yes |
| Büyük,1999      | Yes | Yes      | Secure record                              | Yes            | Fractional D&C                                         | Vaginal ultrasound                                     | Yes     | Yes     | Yes |
| Cacciatore,1994 | Yes | Somewhat | Secure record                              | Yes            | D&C                                                    | Vaginal ultrasound and hysteroscopy                    | Yes     | Yes     | Yes |
| Cameron,2001    | Yes | Yes      | Structured interview, blind to case status | Yes            | Hysteroscopy and biopsy                                | Vaginal ultrasound and saline infusion sonography      | Yes     | Yes     | Yes |
| Cecchini,1996   | Yes | Yes      | Secure record                              | Yes            | Hysteroscopy and curettage                             | Abdominal or vaginal ultrasound                        | Yes     | Yes     | Yes |
| Chan,1994       | Yes | Yes      | Secure record                              | Yes            | D&C or hysterectomy                                    | Vaginal ultrasound                                     | Yes     | Yes     | Yes |
| Cho,2013        | Yes | Yes      | Structured interview, blind to case status | Yes            | D&C                                                    | Vaginal Ultrasound                                     | Yes     | Yes     | Yes |
| Ciatto,2002     | Yes | Yes      | Secure record                              | Yes            | Linkage to cancer registry within 2 years of TVUS      | Vaginal ultrasound                                     | Yes     | Yes     | Yes |
| Conoscenti,1995 | Yes | Yes      | Secure record                              | Yes            | D&C                                                    | Vaginal ultrasound                                     | Yes     | Yes     | Yes |
| Critchley,2004  | Yes | Yes      | Secure record                              | Yes            | Hysteroscopy with pipelle and tao brush biopsy         | Abdominal and/or vaginal ultrasound if no hysteroscopy | Yes     | Yes     | Yes |
| Damle,2013      | Yes | Somewhat | Structured interview, blind to case status | Yes            | D&C or endometrial biopsy                              | No                                                     | N/A     | N/A     | Yes |

|                    |     |          |                                            |     |                                 |                               |                    |         |     |
|--------------------|-----|----------|--------------------------------------------|-----|---------------------------------|-------------------------------|--------------------|---------|-----|
| de Wit,2003        | Yes | Yes      | Secure record                              | Yes | Hysteroscopy and biopsy         | Vaginal ultrasound            | Unclear            | Unclear | Yes |
| Dørum,1993         | Yes | Yes      | Secure record                              | Yes | D&C                             | Vaginal ultrasound            | Yes                | Yes     | Yes |
| Dunn,2001          | Yes | Yes      | Secure record                              | Yes | Biopsy                          | Some ultrasound               | No                 | No      | Yes |
| Elliott,2003       | Yes | Yes      | Structured interview, blind to case status | Yes | Hysteroscopy and biopsy         | No                            | N/A                | N/A     | Yes |
| Emanuel,1995       | Yes | Somewhat | Secure record                              | Yes | Hysteroscopy and biopsy         | Vaginal ultrasound            | Yes                | Yes     | Yes |
| Ewies,2010         | Yes | Yes      | Secure record                              | Yes | Pipelle biopsy                  | Vaginal ultrasound            | No, some follow-up | No      | Yes |
| Ferrazzi,1996      | Yes | Yes      | Structured interview, blind to case status | Yes | D&C and hysteroscopy and biopsy | Ultrasound                    | Yes                | Yes     | Yes |
| Fistonic,1997      | Yes | Yes      | Secure record                              | Yes | D&C                             | Vaginal ultrasound            | Yes                | Yes     | Yes |
| Garuti,1999        | Yes | Yes      | Secure record                              | Yes | Hysteroscopy and curettage      | Vaginal ultrasound            | Yes                | Yes     | Yes |
| Gemer,1998         | Yes | Yes      | Secure record                              | Yes | D&C                             | No                            | N/A                | N/A     | Yes |
| Goldberg,1982      | Yes | Somewhat | Structured interview, blind to case status | Yes | D&C                             | Accurette and Vabra aspirator | Yes                | Yes     | Yes |
| Goldstein,1990     | Yes | Somewhat | Secure record                              | Yes | Biopsy                          | Ultrasound                    | Yes                | Yes     | Yes |
| Granberg,1991      | Yes | Yes      | Structured interview, blind to case status | Yes | Curettage                       | Ultrasound                    | Yes                | Yes     | Yes |
| Grigoriou,1996     | Yes | Somewhat | Secure record                              | Yes | Curettage                       | Vaginal ultrasound            | Yes                | Yes     | Yes |
| Gruboeck,1996      | Yes | Yes      | Structured interview, blind to case status | Yes | Pipelle biopsy or D&C           | Vaginal ultrasound            | Yes                | Yes     | Yes |
| Guisa-Chiferj,1996 | Yes | Somewhat | Secure record                              | Yes | Curettage                       | Vaginal ultrasound            | Yes                | Yes     | Yes |
| Gull,2000          | Yes | Yes      | Secure record                              | Yes | D&C or endometrial biopsy       | Vaginal ultrasound            | No                 | No      | Yes |
| Güner,1996         | Yes | Somewhat | Structured interview, blind to case status | Yes | Fractional curettage            | Ultrasound                    | Yes                | Yes     | Yes |
| Haller,1996        | Yes | Yes      | Secure record                              | Yes | D&C                             | Vaginal ultrasound            | Yes                | Yes     | Yes |



|                   |     |          |                                            |     |                                    |                                                          |                             |         |     |
|-------------------|-----|----------|--------------------------------------------|-----|------------------------------------|----------------------------------------------------------|-----------------------------|---------|-----|
| Hunter,2001       | Yes | Yes      | Secure record                              | Yes | Hysteroscopy and biopsy            | Vaginal ultrasound                                       | Yes                         | Yes     | Yes |
| Iatrakis,1997     | Yes | Somewhat | Secure record                              | Yes | Hysterectomy                       | No                                                       | N/A                         | N/A     | Yes |
| Jillani,2010      | Yes | Somewhat | Structured interview, blind to case status | Yes | D&C                                | Vaginal ultrasound                                       | Yes                         | Yes     | Yes |
| Jones,2001        | Yes | Yes      | Structured interview, blind to case status | Yes | Pipelle biopsy and/or hysteroscopy | Vaginal ultrasound and saline contrast sonohysterography | No                          | No      | Yes |
| Karlsson,1995     | Yes | Yes      | Secure record                              | Yes | D&C                                | Vaginal ultrasound                                       | Yes                         | Yes     | Yes |
| Kekre,1997        | Yes | Somewhat | Secure record                              | Yes | D&C                                | Vaginal ultrasound                                       | Yes                         | Yes     | Yes |
| Kim,2015          | Yes | Yes      | Structured interview, blind to case status | Yes | D&C                                | Vaginal ultrasound                                       | Unclear                     | Unclear | Yes |
| Lee,1995          | Yes | Yes      | Secure record                              | Yes | D&C                                | Unclear                                                  | Unclear                     | Unclear | Yes |
| Liberis,2010      | Yes | Yes      | Secure record                              | Yes | Curettage                          | Hysteroscopy                                             | Yes                         | Yes     | Yes |
| Lin,1993          | Yes | Yes      | Secure record                              | Yes | D&C                                | No                                                       | N/A                         | N/A     | Yes |
| Litta,2005        | Yes | Yes      | Structured interview, blind to case status | Yes | Hysteroscopy and biopsy            | Vaginal ultrasound                                       | Yes                         | Yes     | Yes |
| Loiacono,2015     | Yes | Yes      | Secure record                              | Yes | Hysteroscopy and biopsy            | Vaginal ultrasound                                       | Yes                         | Yes     | Yes |
| Loverro,1999      | Yes | Yes      | Structured interview, blind to case status | Yes | Hysteroscopy and biopsy            | Vaginal ultrasound                                       | Yes                         | Yes     | Yes |
| Malinova,1995     | Yes | Yes      | Secure record                              | Yes | D&C                                | Vaginal ultrasound                                       | Yes                         | Yes     | Yes |
| Mansour,2007      | Yes | Yes      | Structured interview, blind to case status | Yes | D&C or Novak biopsy                | Vaginal ultrasound                                       | Yes                         | Yes     | Yes |
| Mantalenakis,1977 | Yes | Yes      | Secure record                              | Yes | D&C                                | No                                                       | N/A                         | N/A     | Yes |
| Menzies,2011      | Yes | Yes      | Secure record                              | Yes | Hysteroscopy                       | Vaginal ultrasound                                       | Unclear                     | Unclear | Yes |
| Minagawa,2005     | Yes | Yes      | Structured interview, blind to case status | Yes | Hysteroscopy and biopsy            | Vaginal ultrasound and endometrial cytology              | No, with 12 month follow up | No      | Yes |

|                   |     |          |                                            |     |                                        |                                                |         |         |     |
|-------------------|-----|----------|--------------------------------------------|-----|----------------------------------------|------------------------------------------------|---------|---------|-----|
| Mossa,2003        | Yes | Yes      | Structured interview, blind to case status | Yes | Hysteroscopy and biopsy                | Vaginal ultrasound                             | Yes     | Yes     | Yes |
| Nagele,1996       | Yes | Somewhat | Secure record                              | Yes | Hysteroscopy and biopsy                | Pap smear (some), and pelvic ultrasound (some) | Yes     | Yes     | Yes |
| Nasri,1989        | Yes | Somewhat | Secure record                              | Yes | D&C or hysterectomy                    | Vaginal ultrasound                             | Unclear | Unclear | Yes |
| O'connell,1998    | Yes | Yes      | Structured interview, blind to case status | Yes | Fractional curettage with hysteroscopy | Vaginal ultrasound                             | Yes     | Yes     | Yes |
| Osmers,1990       | Yes | Yes      | Structured interview, blind to case status | Yes | Curettage                              | Vaginal ultrasound                             | Yes     | Yes     | Yes |
| Ozer,2016         | Yes | Yes      | Secure record                              | Yes | D&C                                    | Vaginal ultrasound                             | Yes     | Yes     | Yes |
| Panda,2002        | Yes | Yes      | Structured interview, blind to case status | Yes | Hysteroscopy and biopsy                | Vaginal ultrasound                             | No      | No      | Yes |
| Phillip,2004      | Yes | Yes      | Structured interview, blind to case status | Yes | Hysteroscopy and biopsy                | Vaginal ultrasound                             | Yes     | Yes     | Yes |
| Ragupathy,2013    | Yes | Somewhat | Secure record                              | Yes | Pipelle biopsy                         | Vaginal ultrasound                             | Unclear | Unclear | Yes |
| Randelzhofer,2002 | Yes | Yes      | Structured interview, blind to case status | Yes | D&C                                    | Vaginal ultrasound                             | Yes     | Yes     | Yes |
| Sadoon,2009       | Yes | Yes      | Secure record                              | Yes | Hysteroscopy and biopsy                | Vaginal ultrasound                             | Yes     | Yes     | Yes |
| Schindler,1980    | Yes | Yes      | Secure record                              | Yes | Biopsy                                 | Unclear                                        | Unclear | Unclear | Yes |
| Seckin,2016       | Yes | Yes      | Structured interview, blind to case status | Yes | D&C                                    | Vaginal ultrasound                             | Yes     | Yes     | Yes |
| Sheikh,2000       | Yes | Yes      | Structured interview, blind to case status | Yes | Curettage                              | Transabdominal and vaginal ultrasound          | Yes     | Yes     | Yes |
| Sladkevicius,1994 | Yes | Yes      | Secure record                              | Yes | D&C                                    | Vaginal ultrasound                             | Yes     | Yes     | Yes |
| Sousa,2001        | Yes | Yes      | Secure record                              | Yes | Hysteroscopy and biopsy                | Vaginal ultrasound                             | Yes     | Yes     | Yes |
| Spicer,2006       | Yes | Yes      | Structured interview, blind                | Yes | Hysteroscopy and biopsy                | Vaginal ultrasound                             | No      | No      | Yes |

|                    |     |          |                                            |     |                                       |                                                   |     |     |     |
|--------------------|-----|----------|--------------------------------------------|-----|---------------------------------------|---------------------------------------------------|-----|-----|-----|
|                    |     |          | to case status                             |     |                                       |                                                   |     |     |     |
| Swingler,1979      | Yes | Yes      | Structured interview, blind to case status | Yes | Curettage                             | No                                                | N/A | N/A | Yes |
| Taşkin,2006        | Yes | Yes      | Structured interview, blind to case status | Yes | Endometrial biopsy                    | Vaginal ultrasound                                | Yes | Yes | Yes |
| Tinelli,2008       | Yes | Yes      | Structured interview, blind to case status | Yes | Hysteroscopy and biopsy               | Vaginal ultrasound                                | Yes | Yes | Yes |
| Valli,1996         | Yes | Somewhat | Secure record                              | Yes | Hysteroscopy                          | Vaginal ultrasound                                | No  | No  | Yes |
| Van den Bosch,2015 | Yes | Yes      | Structured interview, blind to case status | Yes | Hysteroscopy, biopsy, or hysterectomy | Vaginal ultrasound, fluid instillation sonography | No  | No  | Yes |
| Van Doorn,2007     | Yes | Yes      | Secure record                              | Yes | D&C or hysteroscopy biopsy            | Vaginal ultrasound                                | No  | No  | Yes |
| Weber,1998         | Yes | Yes      | Secure record                              | Yes | D&C or hysterectomy                   | Vaginal ultrasound                                | Yes | Yes | Yes |
| White,1991         | Yes | Somewhat | Secure record                              | Yes | Curettage                             | No                                                | N/A | N/A | Yes |
| Wilailak,2005      | Yes | Yes      | Secure record                              | Yes | Curettage                             | Vaginal ultrasound                                | Yes | Yes | Yes |
| Wolman,1996        | Yes | Yes      | Secure record                              | Yes | D&C                                   | Vaginal ultrasound                                | Yes | Yes | Yes |
| Wong,2016          | Yes | Yes      | Secure record                              | Yes | Hysteroscopy and biopsy               | Vaginal ultrasound                                | No  | No  | Yes |
| Yaman,2002         | Yes | Yes      | Secure record                              | Yes | D&C                                   | Vaginal ultrasound                                | Yes | Yes | Yes |
| Yaman,2008         | Yes | Yes      | Secure record                              | Yes | Hysteroscopy and curettage            | Vaginal ultrasound                                | Yes | Yes | Yes |
| Yildirim,2007      | Yes | Yes      | Structured interview, blind to case status | Yes | D&C                                   | Vaginal ultrasound                                | Yes | Yes | Yes |
| Zaki,2011          | Yes | Yes      | Structured interview, blind to case status | D&C | D&C                                   | Vaginal ultrasound                                | Yes | Yes | Yes |

eTable 2. Results of Sensitivity Analyses Based on Quality Assessment

| Sensitivity analysis                   | No. (%)   | Risk of endometrial cancer in PMB (95% CI) | Tau <sup>2</sup> | <i>P</i> Value for Heterogeneity |
|----------------------------------------|-----------|--------------------------------------------|------------------|----------------------------------|
| Well-described selection criteria      |           |                                            |                  |                                  |
| Yes                                    | 71 (77.2) | 9 (7-11)                                   | 0.66             | .30                              |
| Somewhat                               | 21 (22.8) | 10 (8-13)                                  | 0.21             |                                  |
| Exposure ascertainment                 |           |                                            |                  |                                  |
| Secure record                          | 56 (60.9) | 9 (7-11)                                   | 0.61             | .69                              |
| Blinded structured interview           | 36 (39.1) | 9 (7-12)                                   | 0.48             |                                  |
| Clinical test prior to diagnostic test |           |                                            |                  |                                  |
| Yes                                    | 81 (82.0) | 9 (8-11)                                   | 0.57             | .39                              |
| No                                     | 11 (12.0) | 8 (5-12)                                   | 0.48             |                                  |
| Potential verification bias            |           |                                            |                  |                                  |
| Yes                                    | 13 (14.1) | 6 (4-9)                                    | 0.31             | .02                              |
| No                                     | 71 (77.2) | 10 (8-12)                                  | 0.57             |                                  |
| Unclear                                | 8 (8.7)   | 8 (5-13)                                   | 0.46             |                                  |

eReferences:

1. Wells G, Shea B, O'Connell D, et al. The Newcastle-10 Ottawa Scale (NOS) for assessing the quality of 11 nonrandomised studies in meta-analyses. 12 [http://www.ohri.ca/programs/clinical\\_epidemiology/nos13 gen.pdf](http://www.ohri.ca/programs/clinical_epidemiology/nos13 gen.pdf). 2014. Accessed July 2017.
2. Whiting PF, Rutjes AW, Westwood ME, et al; QUADAS-2 15 Group. QUADAS-2: a revised tool for the quality 16 assessment of diagnostic accuracy studies. *Ann Intern 17 Med*. 2011;155(8):529-536. Medline:22007046
3. Nyaga VN, Arbyn M, Aerts M. Metaprop: a Stata 5 command to perform meta-analysis of binomial data. 6 *Arch Public Health*. 2014;72(1):39. Medline:25810908
4. Ferlay J, Soerjomataram I, Dikshit R, et al. Cancer 16 incidence and mortality worldwide: sources, methods 17 and major patterns in GLOBOCAN 2012. *Int J Cancer*. 18 2015;136(5):E359-E386. Medline:25220842
